# Supplementary material
Source: Research Square preprint supplement (doi:10.21203/rs.3.rs-9304192/v1)
Supplement: Supplementary file 2 [file 48afb74959e31b3cf78bf47b.xlsx]

## Sheet: Sheet1
No.	Adducts	Fragmentation Score	Mass Error (ppm)	Fragment Ions	Metabolites	PubChem CID	Source
1	M+H	97.36	-1.22	143.0859, 156.0939, 157.0652, 171.1173, 181.1015, 199.1122, 201.1278, 217.1228, 227.1071, 245.1178	linderalactone	16215677	Wuyao
2	M-H	64.39	-3.84	297.10138, 312.12442, 313.12961	Laurolitsine	22179	Wuyao
3	M+H	99.63	-0.3	237.09161, 265.08658, 266.09113, 282.08923, 297.11285, 328.15494, 329.15808	BOLDINE	10154	Wuyao
4	M+H-H2O	75.34	-2.75	120.05723, 148.05237, 175.11247, 180.04242, 203.10771, 219.10278, 247.09793, 291.08847	Adenine	190	Wuyao、Fuling
5	M-H	74.08	-2.69	53.7057, 483.34985, 484.35358	Dehydrotumulosic acid	15225964	Fuling
6	M-H	59.83	-3.09	485.36734	Quercetin	5280343	Yizhiren,Fuling
7	M+FA-H	47.63	-2.61	119.0511, 125.0254, 168.9986, 169.0138, 175.0245, 179.0557, 299.1145, 345.0030, 345.0850, 345.1243	Citrulline	833	Tianhuafen
8	M+H	89.73	-1.01	205.10175, 233.09673, 261.09158, 279.10223, 280.10544, 297.11282, 297.14612, 298.14572	Danshenxinkun A	149138	Danshen
9	M+H	97.6	-0.32	251.14371, 254.09444, 279.1384, 297.14905, 298.15207, 315.15964, 316.16296	Neocryptotanshinone	389888	Danshen
10	M-H	0	9.8		Gallic acid	65411	Danshen
11	M+FA-H	60.96	1.62	159.08081, 173.1328, 201.12782, 219.13857, 229.12282, 247.13351	Hulupinic acid	12310637	Danshen
12	M+FA-H	79.08	-2.91	221.09735, 265.08771, 309.07742, 309.20779	tanshinlactone	5321617	Danshen
13	M+FA-H	82.25	-2.46	281.11908, 325.1091	Trijuganone B	124416	Danshen
14	M+FA-H	68.29	-1.47	253.12396, 254.12733, 297.11389, 341.1048	Tanshinol B	126071	Danshen
15	M-H	46.47	4.98	321.13507	Atractylenolide I	174868	Cangzhu
16	M-H2O-H	0	-1.06		Elemicin	10248	Cangzhu
17	M-H	93.85	-2.92	121.02865, 165.05522, 327.10919, 449.14648, 479.15701	Paeoniflorin	442534	Cangzhu、Chishao
18	M+H-H2O	0	1.22	265.12289, 309.11273, 310.11597	Oxypaeoniflorin	51396729	Chishao
19	M+H	97.57	-1.45	105.0342, 133.06528, 151.07581, 161.06004, 179.07083, 197.08144, 301.10757, 319.11844, 481.17343	Albiflorin	24868421	Chishao
20	M+Na	92.38	-0.55	185.04253, 203.05312, 365.10605, 366.10922	Benzoic acid	243	Chishao
21	M+FA-H	71.09	-2.89	283.13498, 311.13, 311.22211	Baicalein	5281605	Chishao
