# Supplementary material
Source: Research Square preprint supplement (doi:10.21203/rs.3.rs-9304192/v1)
Supplement: Supplementary file 3 [file 4c12f95f48effeb206507bed.xlsx]

## Sheet: Sheet1
Gene Name（house mouse）	Sequence（5ʹ-3ʹ）
miR16-5p	Forward primer：AAGCACCTAGCAGCACGTAAATA
	Reverse primer：TATGGTTTTGACGACTGTGTGAT
U6	Forward primer：CAGCACATATACTAAAATTGGAACG
	Reverse primer：ACGAATTTGCGTGTCATCC
FGF7	Forward primer：AGTGCTGGATGGCAGACAAA
	Reverse primer：ATTCATTGGCACGAGCGTTG
Fn1	Forward primer：AGTGGCTGAAGTCGCAAGGAAAC
	Reverse primer：TAAGTCTGGGTCACGGCTGTCTC
α-SMA	Forward primer：GTCCCAGACATCAGGGAGTAA
	Reverse primer：TCGGATACTTCAGCGTCAGGA
ZO-1	Forward primer：GCTTTAGCGAACAGAAGGAGC
	Reverse primer：TTCATTTTTCCGAGACTTCACCA
E-cadherin	Forward primer：CAGTTCCGAGGTCTACACCTT
	Reverse primer：TGAATCGGGAGTCTTCCGAAAA
N-cadherin	Forward primer：AGCGCAGTCTTACCGAAGG
	Reverse primer：TCGCTGCTTTCATACTGAACTTT
GAPDH	Forward primer：AGCTCATTTCCTGGTATGACAAT
	Reverse primer：GGCCCCTCCTGTTATTATGG
