# Supplementary material
Source: Research Square preprint supplement (doi:10.21203/rs.3.rs-9304192/v1)

Supplementary figure
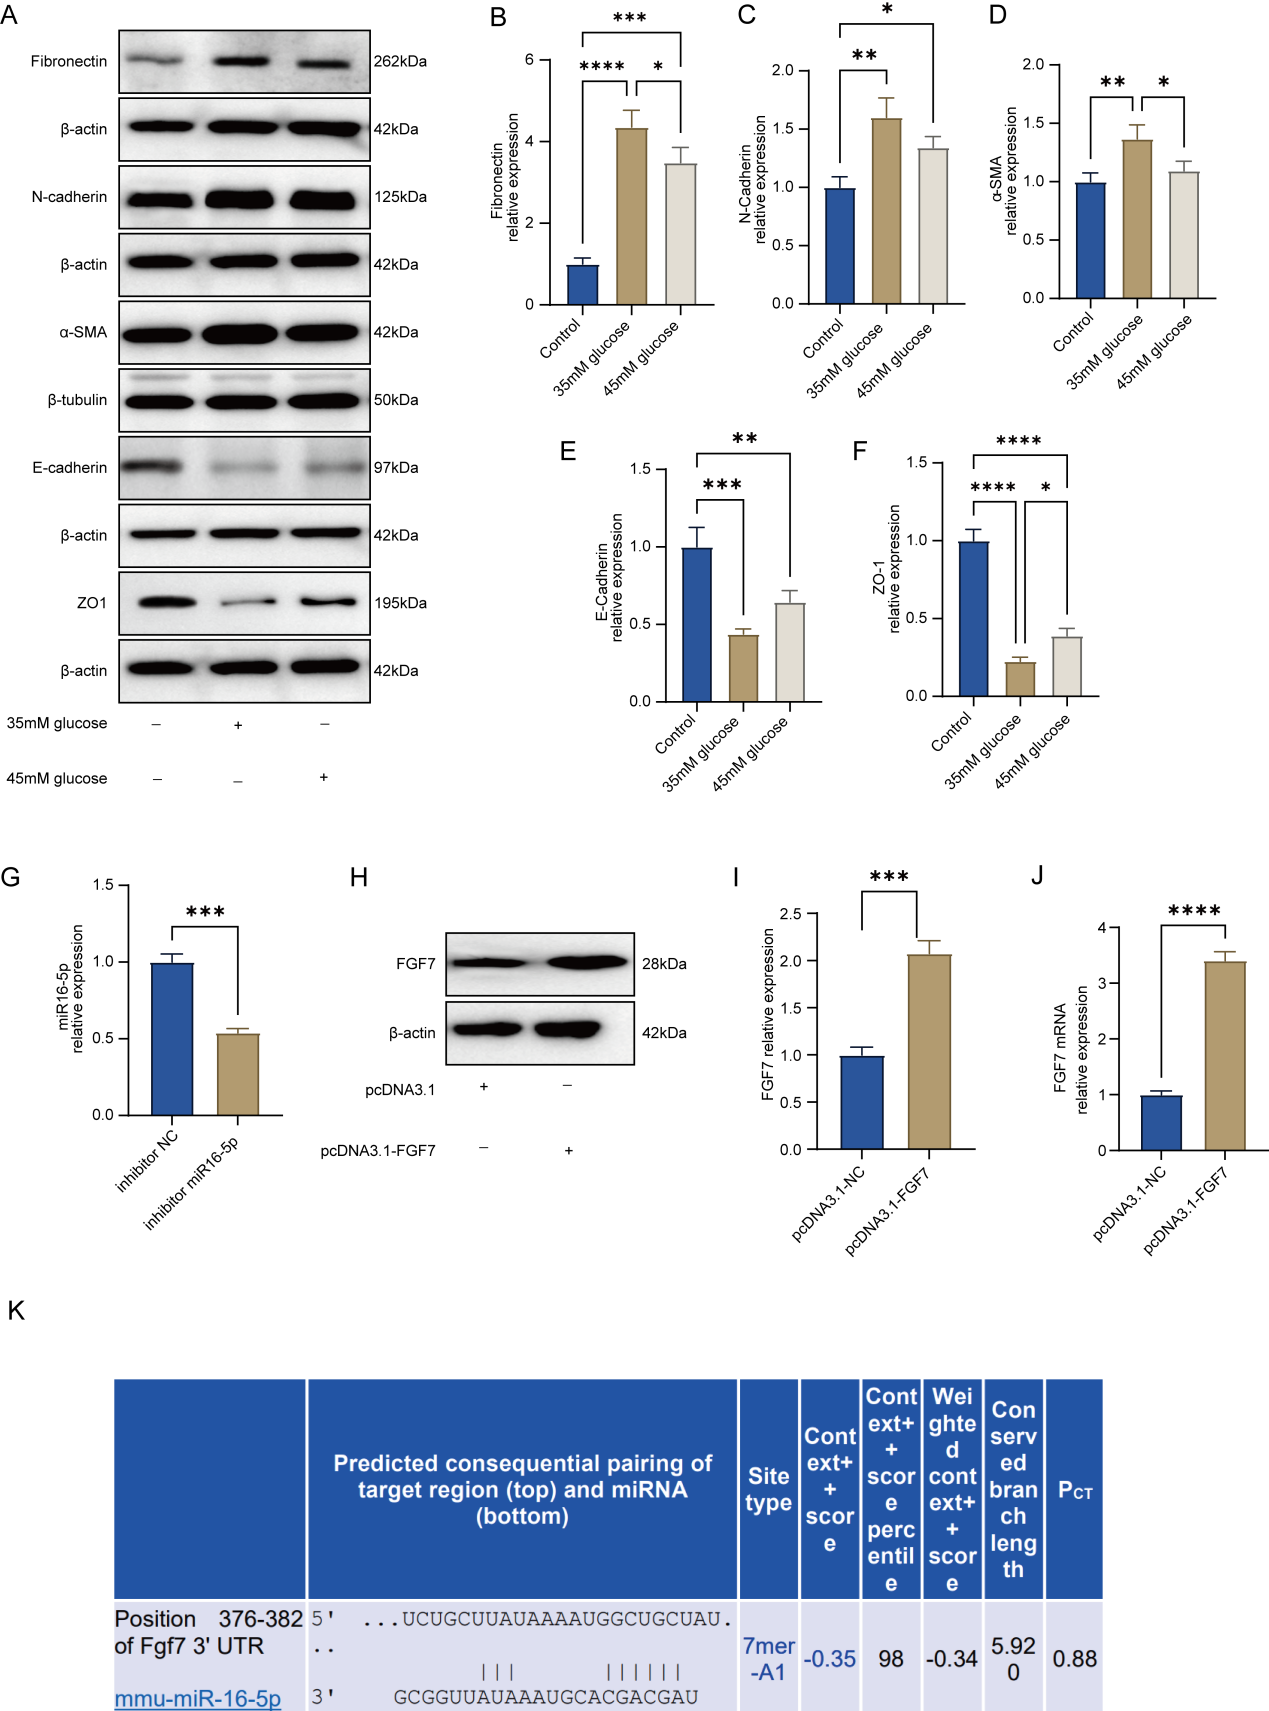

Supplement: Supplementary file 1 [file 01f662c765090d7068c73de8.docx]
